# Supplementary material for: Synchrotron µ-XRF mapping analysis of trace elements in in-situ cultured Japanese red coral, Corallium japonicum
Source: PeerJ. 2022 Aug 23;10:e13931. doi: 10.7717/peerj.13931 (PMC9415360; doi:10.7717/peerj.13931)
Supplement: Supplemental Information 2 — Data is along a transect which is drawn from the center to the surface on a cross section in Figure 5. [file peerj-10-13931-s002.xlsx]

## Sheet: Sheet1
Distance	Mg	P	S	Mg/S
-0.48	6365	788	10628	0.59889
-0.46341	6372	762	10725	0.59413
-0.44682	6153	804	10620	0.57938
-0.43023	6037	794	10781	0.55997
-0.41365	6212	809	10806	0.57487
-0.39706	6354	802	10676	0.59517
-0.38047	6276	817	10999	0.5706
-0.36388	6223	782	10857	0.57318
-0.34729	6407	862	11105	0.57695
-0.3307	6509	816	10748	0.6056
-0.31412	6574	799	10912	0.60246
-0.29753	6445	744	10820	0.59566
-0.28094	6406	788	10631	0.60258
-0.26435	6491	784	10790	0.60158
-0.24776	6607	778	10655	0.62008
-0.23117	6746	804	10949	0.61613
-0.21459	6625	783	11033	0.60047
-0.198	6820	772	10748	0.63454
-0.18141	6746	859	10859	0.62124
-0.16482	6689	840	10786	0.62016
-0.14823	6649	860	10857	0.61242
-0.13164	6731	831	11299	0.59572
-0.11506	6514	802	11233	0.5799
-0.09847	6790	812	10825	0.62725
-0.08188	6941	767	10448	0.66434
-0.06529	7143	833	9889	0.72232
-0.0487	7131	783	9845	0.72433
-0.03211	6999	803	9904	0.70668
-0.01553	6653	809	10180	0.65354
0.00106	6942	796	9783	0.7096
0.01765	7053	811	9579	0.7363
0.03424	7245	736	9371	0.77313
0.05083	7275	806	9425	0.77188
0.06742	7204	754	9427	0.76419
0.084	7077	707	9979	0.70919
0.10059	7253	698	9929	0.73049
0.11718	7021	724	10212	0.68752
0.13377	6909	852.5	10774	0.64127
0.15036	6711.5	858	11156	0.6016
0.16695	6646.5	829	11232	0.59175
0.18353	6642.5	881.5	11254	0.59023
0.20012	6675	868	11286.5	0.59141
0.21671	6660.5	874.5	11238.5	0.59265
0.2333	6702	847	10949.5	0.61208
0.24989	6715	870.5	10685	0.62845
0.26648	6708.5	891	10733.5	0.62501
0.28306	6846	862.5	10761.5	0.63616
0.29965	6804	822	10790	0.63058
0.31624	6789.5	851.5	10687	0.6353
0.33283	6800	886.5	10683	0.63653
0.34942	6915	881	10829	0.63856
0.36601	6929	899	10700	0.64757
0.38259	7013	886	10610	0.66098
0.39918	6987	899	10631	0.65723
0.41577	6856	900	10744.5	0.63809
0.43236	6740.5	842.5	10765.5	0.62612
0.44895	6829.5	846.5	10755	0.63501
0.46554	6952.5	857.5	10765	0.64584
0.48212	6785.5	842	10551	0.64311
0.49871	6752.5	832	10423.5	0.64782
0.5153	6467.5	796.5	10419.5	0.62071
0.53189	6529.5	735	10544.5	0.61923
0.54848	6462.5	762	10440	0.61901
0.56507	6483.5	765	10322.5	0.62809
0.58165	6529	767	10209.5	0.6395
0.59824	6611	774	10388	0.63641
0.61483	6817	777	10438	0.65309
0.63142	6947	804	10315	0.67349
0.64801	6965	809	10418	0.66855
0.6646	7003	814	10116	0.69227
0.68118	6900	813	10360	0.66602
0.69777	6912	791	10295	0.67139
0.71436	6601	754	10375	0.63624
0.73095	6676	810	10187	0.65535
0.74754	6867	794	10083	0.68105
0.76413	6886	743	10056	0.68477
0.78071	6631	810	10129	0.65465
0.7973	6784	790	10290	0.65928
0.81389	6691	823	10769	0.62132
0.83048	6709	897	10810	0.62063
0.84707	6680	864	11040	0.60507
0.86366	6766	884	10991	0.61559
0.88024	6710	879	10939	0.6134
0.89683	6790	852	11091	0.61221
0.91342	6943	876	10835	0.64079
0.93001	6783	839	10930	0.62059
0.9466	6796	844	10848	0.62647
0.96319	6843	842	10795	0.6339
0.97977	6684	799	10654	0.62737
0.99636	6728	838	10661	0.63109
1.01295	6701	811	10476	0.63965
1.02954	6816	846	10678	0.63832
1.04613	6569	819	10774	0.60971
1.06272	6874	861	10728	0.64075
1.0793	6768	855	10622	0.63717
1.09589	6776	823	10586	0.64009
1.11248	6869	839	10709	0.64142
1.12907	6790	863	10799	0.62876
1.14566	6908	858	10716	0.64464
1.16225	6698	912	10723	0.62464
1.17883	6739	861	10594	0.63611
1.19542	6604	828	10660	0.61951
1.21201	6546	865	10642	0.61511
1.2286	6448	893	10586	0.60911
1.24519	6407	783	10549	0.60736
1.26178	6643	805	10500	0.63267
1.27836	6537	829	10549	0.61968
1.29495	6491	870	10423	0.62276
1.31154	6493	786	10273	0.63205
1.32813	6627	868	10360	0.63967
1.34472	6535	747	10339	0.63207
1.36131	6267	829	10459	0.5992
1.37789	6156	789	10058	0.61205
1.39448	6093	861	9943	0.61279
1.41107	5884	809	9796	0.60065
1.42766	6007	841	9952	0.6036
1.44425	6271	896	10554	0.59418
1.46084	6467	1049	11476	0.56352
1.47742	3904	913	7789	0.50122
1.49401	2039	671	4569	0.44627
1.5106	1411	605	3247	0.43455
1.52719	1251	639	3107	0.40264
1.54378	1236	582	2819	0.43845
1.56037	1147	538	2447	0.46874
1.57695	1165	531	2417	0.482
1.59354	1088	577	2650	0.41057
